# Supplementary material for: 4-(Hydroxymethyl)catechol Extracted From Fungi in Marine Sponges Attenuates Rheumatoid Arthritis by Inhibiting PI3K/Akt/NF-κB Signaling
Source: PubMed Central journal article supplement (PMC6062625; doi:10.3389/fphar.2018.00726), 2018-07-20
Supplement: Presentation_1.pdf [file Presentation_1.pdf]

## *Supplementary Materials*

# **4-(Hydroxymethyl)catechol Extracted from Fungi in Marine Sponges Attenuates Rheumatoid Arthritis by Inhibiting PI3K/Akt/NF- $\kappa$ B Signaling**

**Jong Yeong Lee, Geum Jin Kim, Jin Kyeong Choi, Young-Ae Choi, Na-Hee Jeong, Hyukjae Choi\*, Sang-Hyun Kim\***

\* **Correspondence:** Sang-Hyun Kim: shkim72@knu.ac.kr and Hyukjae Choi: h5choi@yu.ac.kr

### **1. Supplementary material and method**

#### **Determination of cytokines and MMP1/3**

Serum samples were collected at the end of experiments. The levels of mouse serum TNF- $\alpha$ , IL-1 $\beta$ , and IL-6 were quantified by a 20-plex mouse cytokine assays (luminex platform, Invitrogen). MMP-1 was determined using an assay kit (LSBio), and MMP-3 was measured by ELISA kit (R&D Systems) according to the manufacturer's instructions.

#### **Specific inhibitors**

LY294002 and pyrrolidine dithiocarbamate (PDTC) were purchased from Calbiochem (La Jolla, CA). RA synovial fibroblasts were pre-treated with LY294002 (20  $\mu$ M) and PDTC (20  $\mu$ M) for 1 h, followed by stimulation with TNF- $\alpha$  (10 ng/mL) for 12 h.

## 2. Legend for supplementary figures

**Fig. S1.** Chemical structure of 4-(hydroxymethyl)catechol.

**Fig. S2.**  $^1\text{H}$  NMR spectrum (250 MHz,  $\text{CD}_3\text{OD}$ ) of 4-(hydroxymethyl)catechol.

**Fig. S3.**  $^{13}\text{C}$  NMR spectrum (63 MHz,  $\text{CD}_3\text{OD}$ ) of 4-(hydroxymethyl)catechol.

**Fig. S4.** Experimental design for the induction of collagen-induced arthritis (CIA).

Mice were initially immunized by subcutaneous tail vein injection of 100  $\mu\text{g}$  of bovine type-II collagen emulsified with complete Freund's adjuvant (1:1). A second injection of 100  $\mu\text{g}$  of bovine type-II collagen emulsified with incomplete Freund's adjuvant (1:1) was administered subcutaneously in the tail 21 days later. CIA mice were orally administered 4-HMC or Dexa from day 28 to day 53 after the primary immunization. 4-HMC, 4-(hydroxymethyl)catechol; Dexa, dexamethasone.

**Fig. S5.** Serum levels of cytokines and matrix metalloproteinases (MMPs).

Blood samples from vehicle-control mice, untreated collagen-induced arthritis (CIA) mice, CIA mice treated with 4-HMC (50 mg/kg), and CIA mice treated with Dexa (1 mg/kg) were collected from the celiac artery on day 56. The data are presented as the mean  $\pm$  SD of five determinations. \* $p < 0.05$ , significantly different from untreated CIA mice. 4-HMC, 4-(hydroxymethyl)catechol; Dexa, dexamethasone.

**Fig. S6.** Effects of 4-HMC on the viability of rheumatoid arthritis synovial fibroblasts.

Cell viability within 24 h was determined by the MTT assay. The data are presented as the mean  $\pm$  SD of five determinations. \* $p < 0.05$ , significantly different from control. 4-HMC, 4-(hydroxymethyl)catechol.

**Fig. S7.** Gene expression in TNF- $\alpha$ -induced rheumatoid arthritis synovial fibroblasts isolated from two other donors was analyzed by qPCR.

The data are presented as the mean  $\pm$  SD. \* $p < 0.05$ , significantly different from untreated TNF- $\alpha$ -stimulated cells. 4-HMC, 4-(hydroxymethyl)catechol; Dexam, dexamethasone.

**Fig. S8.** Effects of specific inhibitors on TNF- $\alpha$ -stimulated rheumatoid arthritis synovial fibroblasts from two other donors.

Cells were pretreated with specific inhibitors of PI3K (LY294002, 20  $\mu$ M) and NF- $\kappa$ B (PDTC, 20  $\mu$ M) for 1 h before stimulation with TNF- $\alpha$  (10 ng/mL) for 12 h. Cytokine expression was determined by qPCR. The data are presented as the mean  $\pm$  SD. \* $p < 0.05$  significantly different from untreated TNF- $\alpha$ -stimulated cells.

**Table S1.**  $^1\text{H}$  (250 MHz,  $\text{CD}_3\text{OD}$ ) and  $^{13}\text{C}$  NMR (63 MHz,  $\text{CD}_3\text{OD}$ ) data of 4-HMC.

| Position | $\delta_{\text{C}}$ | $\delta_{\text{H}}$ (multiplicity, J in Hz) |
|----------|---------------------|---------------------------------------------|
| 1        | 151.1, C            |                                             |
| 2        | 148.9, C            |                                             |
| 3        | 115.8, CH           | 6.76 (d, 2.7)                               |
| 4        | 129.5, C            |                                             |
| 5        | 116.7, CH           | 6.54 (dd, 2.8, 8.6)                         |
| 6        | 115.5, CH           | 6.62 (d, 8.5)                               |
| 7        | 61.1, $\text{CH}_2$ | 4.59 (s)                                    |

**Table S2.** List of primers for qPCR experiments.

|       | Gene           | Forward primer (5'-3')            | Reverse primer (5'-3')            |
|-------|----------------|-----------------------------------|-----------------------------------|
| Human | TNF- $\alpha$  | CCT ACC AGA CCA AGG TCA AC        | AGG GGG TAA TAA AGG GAT TG        |
|       | IL-1 $\beta$   | GGA TAT GGA GCA ACA AGT GG        | ATG TAC CAG TTG GGG AAC TG        |
|       | IL-6           | AAA GAG GCA CTG GCA GAA AA        | ATC TGA GGT GCC CAT GCT AC        |
|       | MMP-1          | TGG ACC TGG AGG AAA TCT TG        | AGT TCA TGA GCT GCA ACA CG        |
|       | MMP-3          | TTC CTT GGA TTG GAG GTG AC        | TGC CAG GAA AGG TTC TGA AG        |
|       | $\beta$ -actin | GGA CTT CGA GCA AGA GAT GG        | AGC ACT GTG TTG GCG TAC AG        |
| Mouse | IFN- $\gamma$  | TCA AGT GGC ATA GAT GTG GAA GAA   | TGG CTC TGC AGG ATT TTC ATG       |
|       | IL-17          | TCC CTC TGT CAT CTG GGA AG        | CTC GAC CCT GAA AGT GAA GG        |
|       | TNF- $\alpha$  | GGC AGG TCT ACT TTG GAG TCA TTG C | ACA TTC GAG GCT CCA GTG AAT TCG G |
|       | IL-1 $\beta$   | ATA ACC TGC TGG TGT GTG AC        | AGG TGC TGA TGT ACC AGT TG        |
|       | IL-6           | CCG GAG AGG AGA CTT CAC AG        | GGA AAT TGG GGT AGG AAG GA        |
|       | MMP-1          | CCT TCC TTT GCT GTT GCT TC        | AGC CCA AAT AAC TGC TGC AT        |
|       | MMP-3          | AAG TTC CTC GGG TTG GAG AT        | TTT CAA TGG CAG AAT CCA CA        |
|       | $\beta$ -actin | TAG ACT TCG AGC AGG AGA TG        | TTG ATC TTC ATG GTG CTA GG        |

**Table S3.** Effects of 4-HMC on mean body weight, water and food consumption in male DBA/1J mice.

| Treatment<br>(mg/kg) | Body weight<br>(mg) | Water consumption<br>(ml) | Food consumption<br>(g) |
|----------------------|---------------------|---------------------------|-------------------------|
| Control              | 23.31 ± 1.26        | 6.21 ± 0.34               | 4.31 ± 0.25             |
| CIA                  | 21.22 ± 1.53        | 6.13 ± 0.88               | 3.81 ± 0.53             |
| CIA+4-HMC (2)        | 21.42 ± 1.48        | 6.05 ± 0.53               | 3.88 ± 0.42             |
| CIA+4-HMC (10)       | 21.47 ± 1.51        | 6.12 ± 0.47               | 3.91 ± 0.48             |
| CIA+4-HMC (50)       | 23.23 ± 1.36        | 6.19 ± 0.31               | 4.27 ± 0.30             |
| CIA+Dexa (1)         | 23.43 ± 1.23        | 6.23 ± 0.33               | 4.29 ± 0.33             |

The data are presented as the mean ± SD of five determinations.

4-HMC, 4-(hydroxymethyl)catechol; Dexa, dexamethasone.

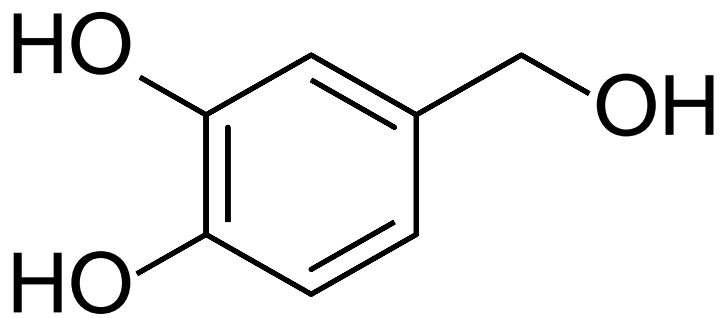

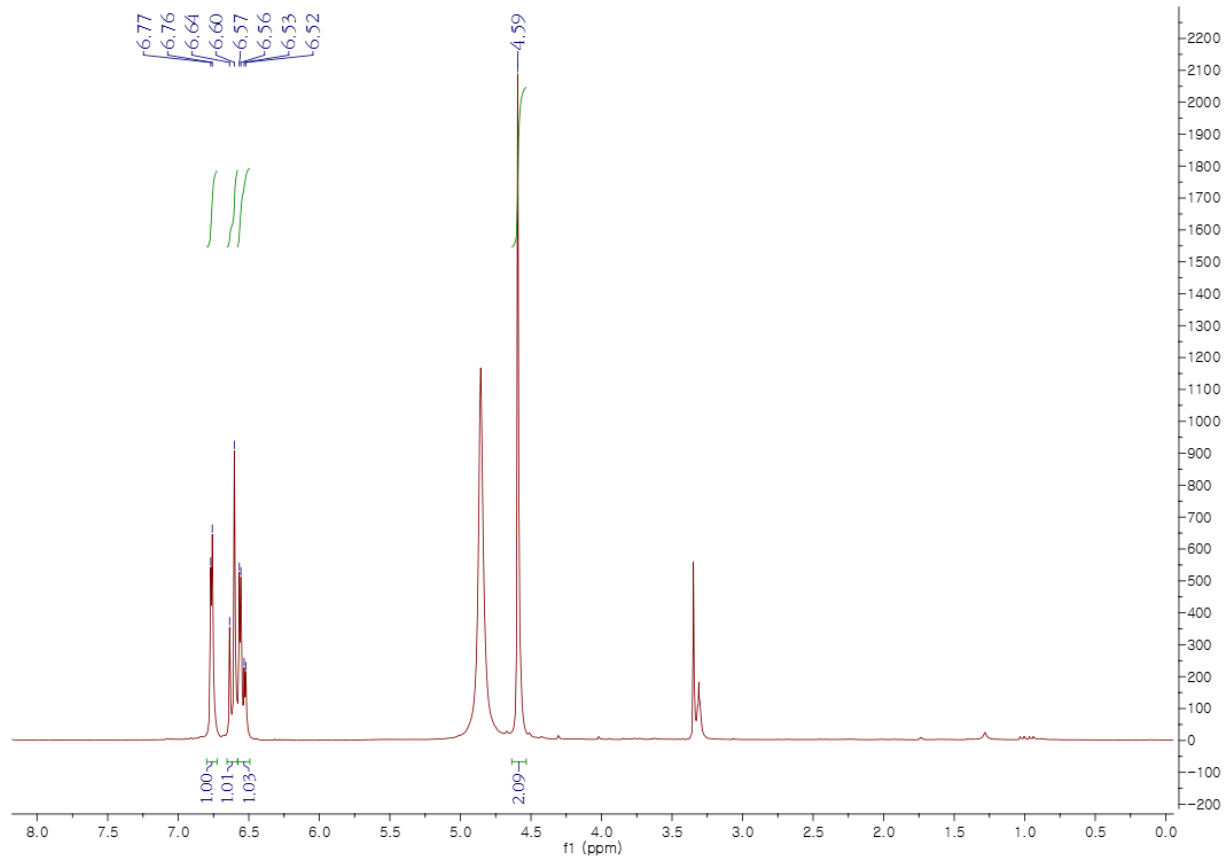

Supplementary Figure S2



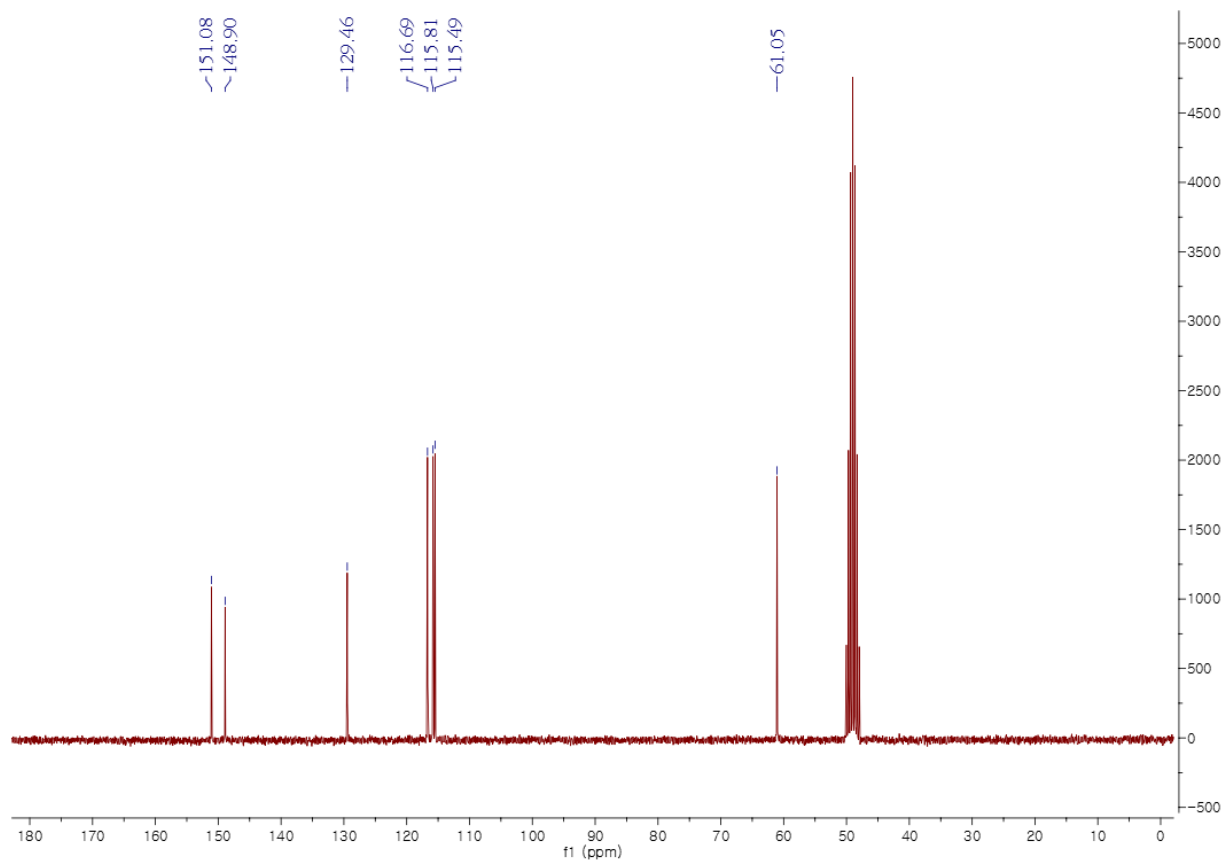

Supplementary Figure S3

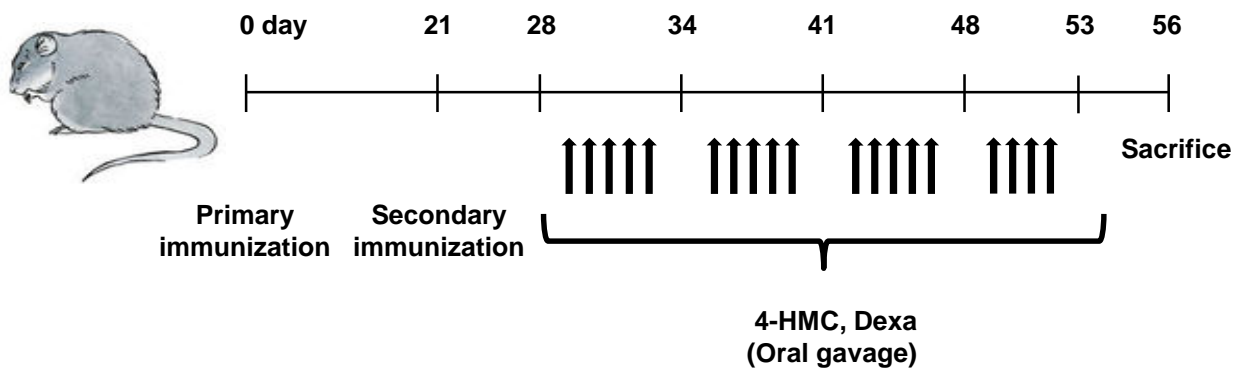

Supplementary Figure S4

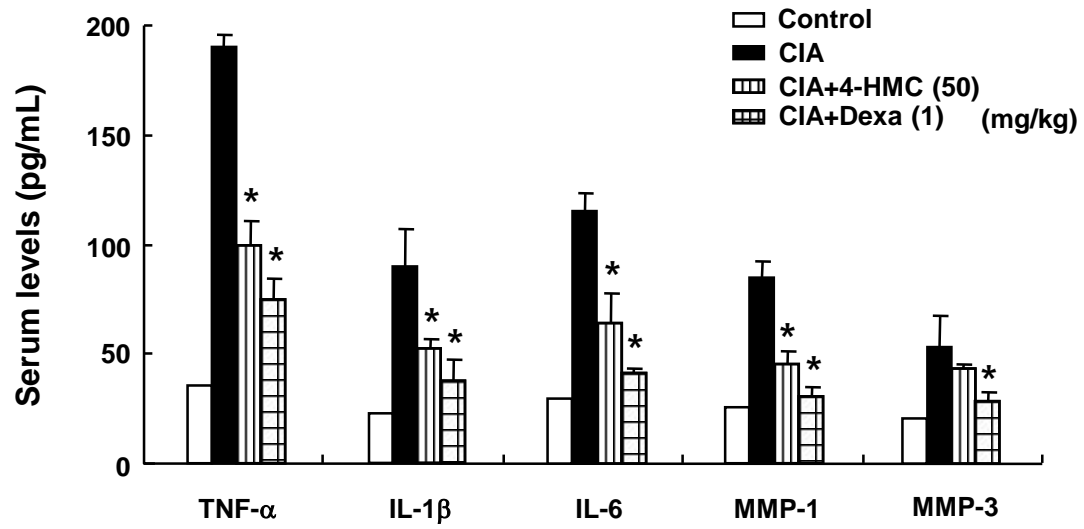

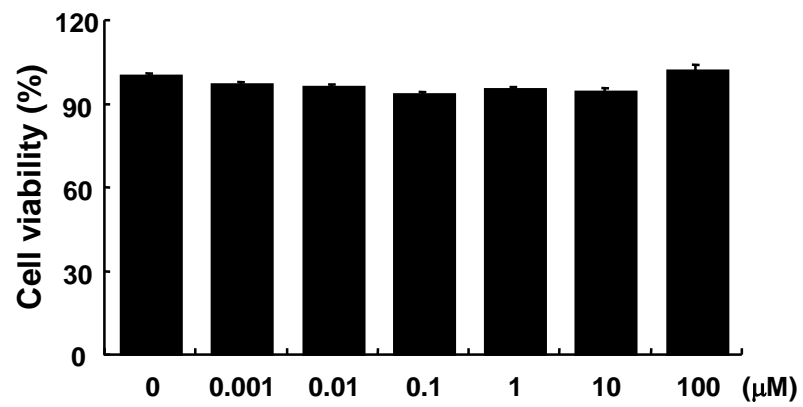

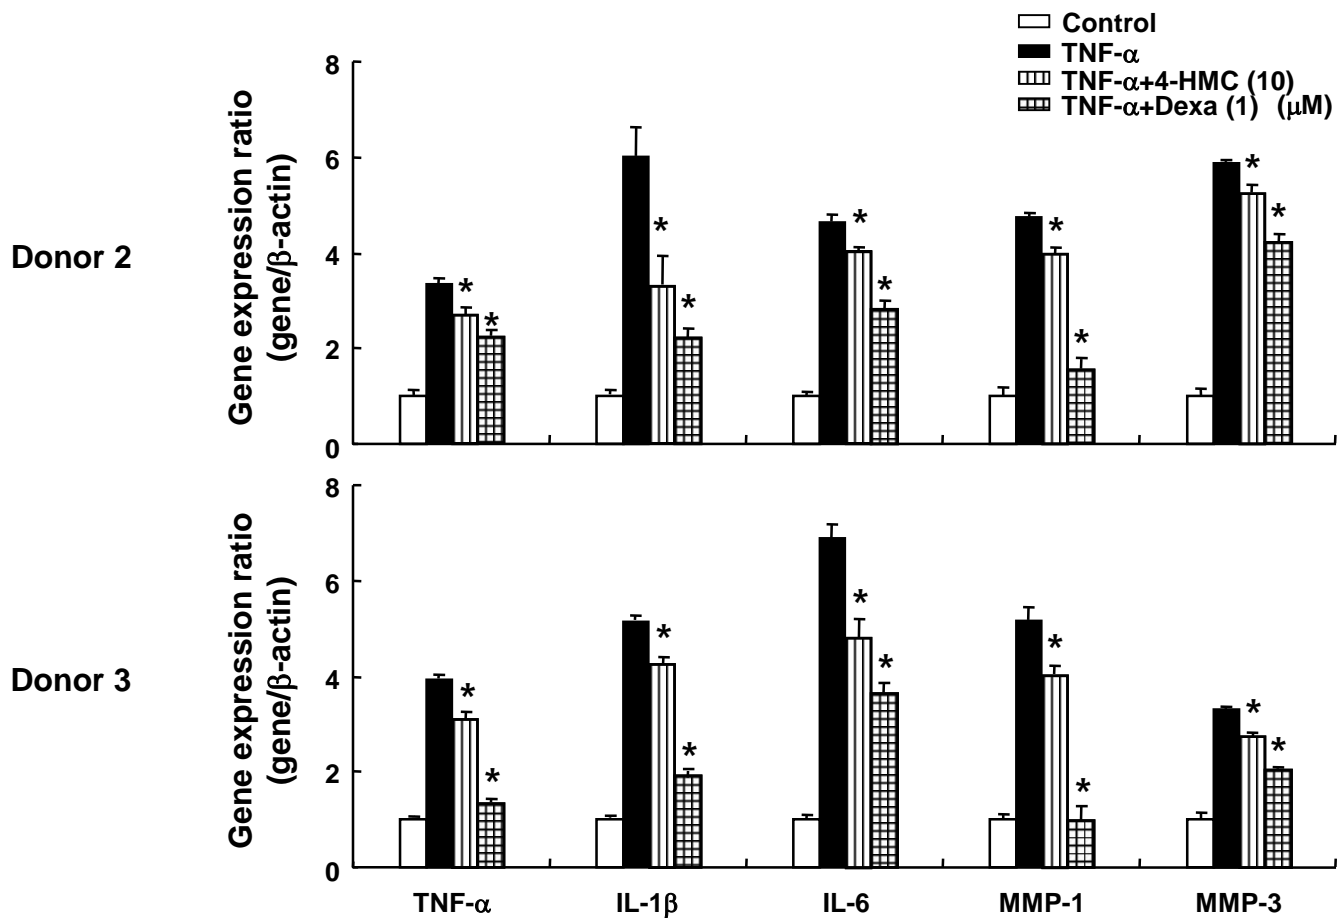

Supplementary Figure S7

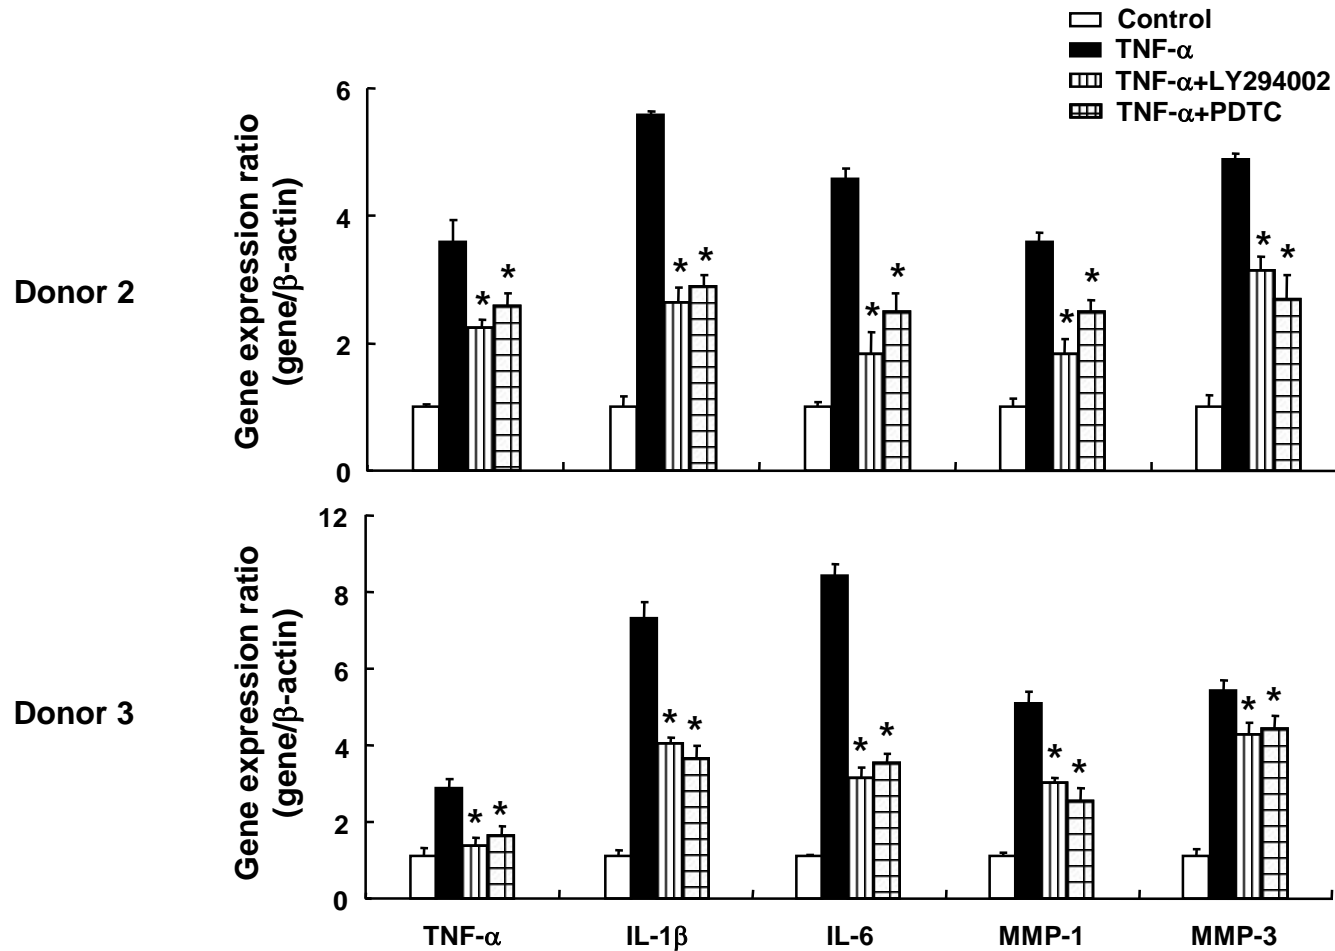

Supplementary Figure S8
